# Supplementary material for: Efficient and environmentally friendly Glaser coupling of terminal alkynes catalyzed by multinuclear copper complexes under base-free conditions
Source: Royal Society of Chemistry journal article supplement (doi:10.1039/c6ra01262k), 2016-01-01
Supplement: c6ra01262k1.pdf [file c6ra01262k1.pdf]

# Efficient and environment-friendly Glaser coupling of terminal alkyne catalyzed by multinuclear copper complexes under base-free condition

Ling-Juan Zhang, Yan-Hong Wang, Jie Liu, Mei-Chen Xu, Xian-Ming Zhang\*

*School of Chemistry & Material Science, Shanxi Normal University Linfen 041004, P. R. China.*

## Table of Contents

|                                                                                 |     |
|---------------------------------------------------------------------------------|-----|
| 1. General information.....                                                     | S2  |
| 2. View of dinuclear compound <b>1</b> .....                                    | S2  |
| 3. View of tetranuclear mixed-valence compound <b>2</b> .....                   | S2  |
| 4. The PXRD patterns of the fresh and five times reused compound <b>2</b> ..... | S3  |
| 5. NMR analytical data of coupling products.....                                | S3  |
| 6. NMR spectra of coupling products.....                                        | S7  |
| 7. MS spectra of <b>2a</b> , <b>2k</b> .....                                    | S24 |
| 8. References.....                                                              | S25 |

## 1、 General information

All the solvents were obtained from commercial suppliers and used without further purification. Thin layer chromatography (TLC) employed glass 0.25 mm silica gel plates. Flash chromatography columns were packed with 200-300 mesh silica gel in petroleum (bp. 60-90°C). GC-MS spectra were recorded on a Thermo Fisher GC-MS Poparis Q. GC yields were recorded with Agilent 7820A gas chromatography instrument with a FID detector. All new compounds were characterized by  $^1\text{H}$  NMR,  $^{13}\text{C}$  NMR and GC-MS. The known compounds were characterized by  $^1\text{H}$  NMR.  $^1\text{H}$  and  $^{13}\text{C}$  NMR datas were recorded with ASCend TM 600 MHz with tetramethylsilane as an internal standard. All chemical shifts ( $\delta$ ) were reported in ppm and coupling constants ( $J$ ) in Hz. All chemical shifts were reported relative to tetramethylsilane (0 ppm for  $^1\text{H}$ ), and  $\text{CDCl}_3$ (77.16 ppm for  $^{13}\text{C}$ ), respectively.

## 2、 View of planar dinuclear structure of compound 1 [ $\text{Cu}_2(\text{o phen})_2$ ].

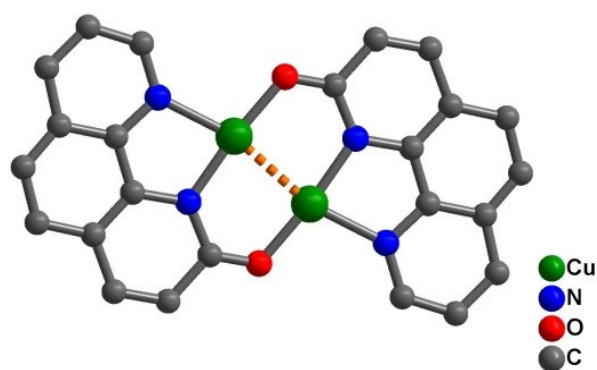

## 3、 View of tetranuclear mixed-valence compound 2 [ $\text{Cu}_4(\text{o phen})_4(\text{tp})$ ].

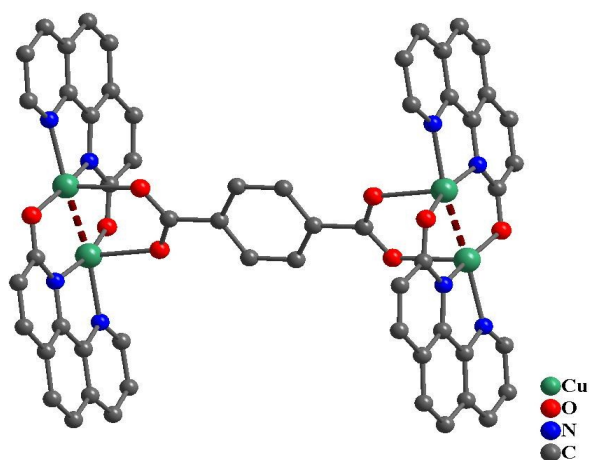

#### 4、 The PXRD patterns of the fresh and after catalyzed compound 2.

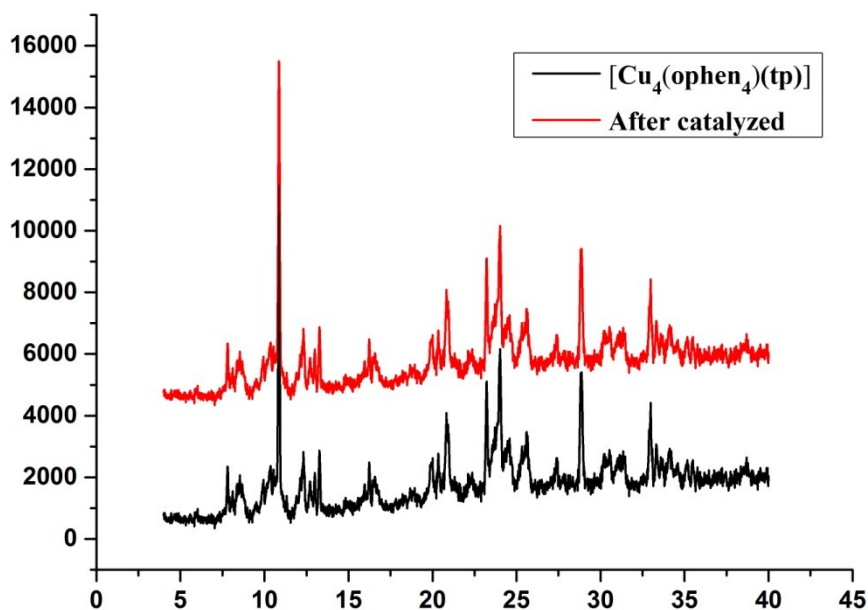

#### 5、 NMR analytical data of homocoupling products

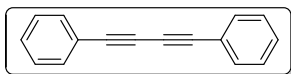

##### 1,4-Diphenyl-1,3-butadiyne (2a)<sup>1</sup>:

White solid; <sup>1</sup>H NMR (600 MHz, CDCl<sub>3</sub>)  $\delta$  7.47-7.46 (d,  $J = 6.0$  Hz, 4H), 7.31-7.27 (m,  $J = 6.0$  Hz, 6H). <sup>13</sup>C NMR (150 MHz, CDCl<sub>3</sub>)  $\delta$  131.5, 128.2, 127.4, 120.8, 80.5, 72.9.

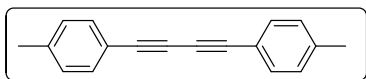

##### 1,4-Bis(*p*-methylphenyl)-1,3-butadiyne (2b)<sup>1</sup>:

White solid; <sup>1</sup>H NMR (600 MHz, CDCl<sub>3</sub>):  $\delta$  7.42-7.40 (d,  $J = 6.0$  Hz, 4H), 7.14-7.13 (d,  $J = 6.0$  Hz, 4H), 2.36 (s, 6H). <sup>13</sup>C NMR (150 MHz, CDCl<sub>3</sub>)  $\delta$  138.5, 131.4, 128.2, 117.8, 80.5, 72.4, 20.6.

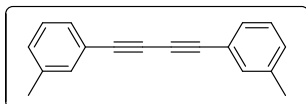

##### 1,4-Bis(*m*-methylphenyl)-1,3-butadiyne (2c)<sup>1</sup>:

White solid; <sup>1</sup>H NMR (600 MHz, CDCl<sub>3</sub>):  $\delta$  7.27-7.25 (d,  $J = 6.0$  Hz, 4H), 7.16-7.13 (m,  $J = 6.0$  Hz, 2H), 7.11-7.10 (d,  $J = 6.0$  Hz, 2H), 2.26 (s,  $J = 6.0$  Hz, 6H). <sup>13</sup>C NMR (150 MHz, CDCl<sub>3</sub>)  $\delta$  137.1, 132.0, 129.1, 128.6, 127.3, 120.6, 80.6, 72.6, 20.2.

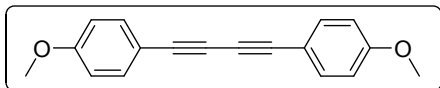

**1,4-Bis(*p*-methoxyphenyl)-1,3-butadiyne (2d)<sup>1</sup>:**

White solid; <sup>1</sup>H NMR (600 MHz, CDCl<sub>3</sub>): δ 7.40-7.38 (d, *J* = 6.0 Hz, 4H), 6.79-6.78 (d, *J* = 6.0 Hz, 4H), 3.76 (s, 6H). <sup>13</sup>C NMR (150 MHz, CDCl<sub>3</sub>) δ 139.5, 132.4, 129.2, 118.8, 81.5, 73.4, 21.6.

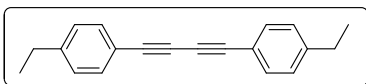

**1,4-Bis(*p*-ethylphenyl)buta-1,3-diyne (2e)<sup>2</sup>:**

White solid; <sup>1</sup>H NMR (600 MHz, CDCl<sub>3</sub>): δ 7.38-7.37 (d, *J* = 6 Hz, 4 H), 7.10-7.09 (d, *J* = 6 Hz, 4 H), 2.61-2.58 (m, *J* = 6 Hz, 4 H), 1.18-1.15 (m, *J* = 6 Hz, 6 H). <sup>13</sup>C NMR (150 MHz, CDCl<sub>3</sub>) δ 144.7, 131.5, 127.0, 118.00, 80.5, 72.4, 27.9, 14.2.

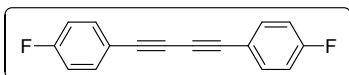

**1,4-Bis(*p*-fluorophenyl)buta-1,3-diyne (2f)<sup>2</sup>:**

White solid; <sup>1</sup>H NMR (600 MHz, CDCl<sub>3</sub>): δ 7.45-7.43 (m, *J* = 6 Hz, 4 H), 6.98-6.96 (m, *J* = 6 Hz, 4 H). <sup>13</sup>C NMR (150 MHz, CDCl<sub>3</sub>) δ 161.2, 133.5, 116.8, 114.9, 79.4, 72.5.

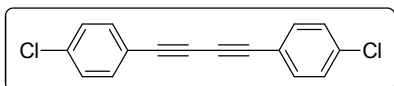

**1,4-Bis(*p*-chlorophenyl)buta-1,3-diyne (2g) <sup>7</sup>:**

White solid; <sup>1</sup>H NMR (600 MHz, CDCl<sub>3</sub>): δ 7.47-7.46 (m, *J* = 6 Hz, 4H), 7.34-7.33 (m, *J* = 6 Hz, 4H). <sup>13</sup>C NMR (150 MHz, CDCl<sub>3</sub>) δ 133.7, 130.8, 128.9, 121.8, 76.2, 71.6.

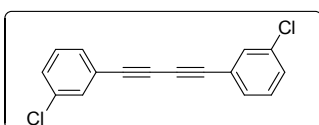

**1,4-Bis(*m*-chlorophenyl)-1,3-butadiyne (2h)<sup>1</sup>:**

<sup>1</sup>H NMR (600 MHz, CDCl<sub>3</sub>): δ 7.44 (s, *J* = 6 Hz, 2H), 7.35-7.33 (m, *J* = 6 Hz, 2H), 7.30-7.28 (m, *J* = 6 Hz, 2H), 7.21-7.19 (m, *J* = 6 Hz, 2H). <sup>13</sup>C NMR (150 MHz, CDCl<sub>3</sub>) δ 133.3, 131.3, 129.6, 128.7, 122.3, 79.5, 73.7.

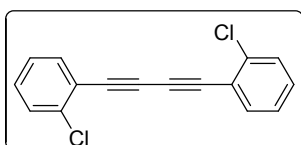

**1,4-Bis(*o*-chlorophenyl)-1,3-butadiyne (2i)<sup>4</sup>:**

White solid;  $^1\text{H}$  NMR (600 MHz,  $\text{CDCl}_3$ ):  $\delta$  7.52-7.50 (m,  $J = 6$  Hz, 2H), 7.36-7.35 (d,  $J = 6$  Hz, 2H), 7.25-7.23 (m,  $J = 6$  Hz, 2H), 7.18-7.17 (m,  $J = 6$  Hz, 2H).  $^{13}\text{C}$  NMR (150 MHz,  $\text{CDCl}_3$ )  $\delta$  136.0, 133.4, 129.3, 128.4, 125.5, 120.8, 78.4, 75.8.

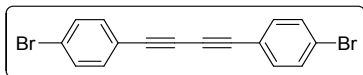

**1,4-Bis(p-bromophenyl)buta-1,3-diyne (2j)<sup>3</sup>:**

Pale yellow solid;  $^1\text{H}$  NMR (600 MHz,  $\text{CDCl}_3$ ):  $\delta$  7.42-7.41 (d,  $J = 6$  Hz, 4H), 7.32-7.31 (d,  $J = 6$  Hz, 4H).  $^{13}\text{C}$  NMR (150 MHz,  $\text{CDCl}_3$ )  $\delta$  132.8, 131.7, 130.8, 110.6, 76.2, 72.6.

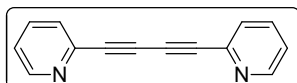

**1,4-Bis(2-pyridyl)buta-1,3-diyne (2k)<sup>10</sup>:**

White solid;  $^1\text{H}$  NMR (600 MHz,  $\text{CDCl}_3$ ):  $\delta$  8.56-8.55 (d,  $J = 6$  Hz, 2H), 7.62-7.61 (m,  $J = 6$  Hz, 2H), 7.49-7.47 (m,  $J = 6$  Hz, 2H), 7.24-7.23 (m,  $J = 6$  Hz, 2H).  $^{13}\text{C}$  NMR (150 MHz,  $\text{CDCl}_3$ )  $\delta$  149.4, 140.9, 135.2, 127.4, 122.8, 79.9, 72.2.

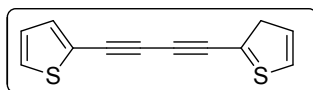

**1,4-Bis(4-thienylphenyl)-1,3-butadiyne (2l)<sup>6</sup>:**

White solid;  $^1\text{H}$  NMR (600 MHz,  $\text{CDCl}_3$ ):  $\delta$  7.28-7.27 (d,  $J = 6$  Hz, 2H), 7.26-7.25 (d,  $J = 6$  Hz, 2H), 6.94-6.92 (m,  $J = 6$  Hz, 2H).  $^{13}\text{C}$  NMR (150 MHz,  $\text{CDCl}_3$ )  $\delta$  133.4, 127.9, 126.2, 120.9, 76.7, 75.6.

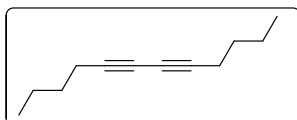

**5,7-Dodecadiyne (2m)<sup>5</sup>:**

White solid;  $^1\text{H}$  NMR (600 MHz,  $\text{CDCl}_3$ ):  $\delta$  2.19-2.17 (m,  $J = 6$  Hz, 4H), 1.44-1.42 (m,  $J = 6$  Hz, 4H), 1.36-1.34 (m,  $J = 6$  Hz, 4H) 0.85-0.82 (m,  $J = 6$  Hz, 6H).  $^{13}\text{C}$  NMR (150 MHz,  $\text{CDCl}_3$ )  $\delta$  76.5, 64.2, 29.4, 28.7, 20.9, 17.9, 12.5.

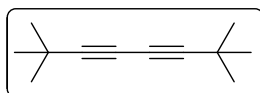

**2,2,7,7-Tetramethylocta-3,5-diyne (2n)<sup>8</sup>:**

White solid;  $^1\text{H}$  NMR (600 MHz,  $\text{CDCl}_3$ ):  $\delta$  1.28 (s,  $J = 6.0$  Hz, 18H).  $^{13}\text{C}$  NMR (150 MHz,  $\text{CDCl}_3$ )  $\delta$  85.3, 62.6, 29.6, 27.0.

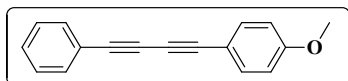

**1-methoxy-4-(phenylbuta-1,3-diynyl)benzene (3a)<sup>11</sup>:**

White solid; <sup>1</sup>H NMR (600 MHz, CDCl<sub>3</sub>): δ 7.54-7.53 (d, *J* = 6 Hz, 2H), 7.50-7.48 (d, *J* = 6 Hz, 2H), 7.39-7.34 (m, *J* = 6 Hz, 3H), 6.88-6.87 (d, *J* = 6 Hz, 2H), 3.84 (s, *J* = 6 Hz, 3H). <sup>13</sup>C NMR (150 MHz, CDCl<sub>3</sub>) δ 150.3, 133.1, 131.4, 128.0, 127.4, 121.0, 113.1, 112.7, 80.8, 79.9, 73.1, 71.7, 54.3.

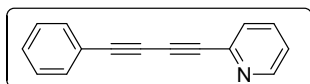

**2-(phenylbuta-1,3-diynyl)pyridine (3b)<sup>12</sup>:**

White solid; <sup>1</sup>H NMR (600 MHz, CDCl<sub>3</sub>): δ 8.64 (s, *J* = 6 Hz, 1H), 7.70-7.69 (m, *J* = 6 Hz, 1H), 7.58-7.54 (m, *J* = 6 Hz, 3H), 7.43-7.36 (m, *J* = 6 Hz, 3H), 7.31-7.29 (m, *J* = 6 Hz, 1H). <sup>13</sup>C NMR (150 MHz, CDCl<sub>3</sub>) δ 150.4, 142.3, 136.2, 132.7, 129.6, 128.5, 128.1, 123.5, 121.3, 82.5, 80.2, 73.8, 73.6.

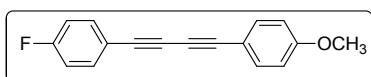

**4-methoxy-(4-fluorophenyl)buta-1,3-diynyl)benzene (3c):**

White solid; <sup>1</sup>H NMR (600 MHz, CDCl<sub>3</sub>): δ 7.53-7.48 (m, *J* = 6 Hz, 4H), 7.06-7.03 (m, *J* = 6 Hz, 2H), 6.88-6.87 (m, *J* = 6 Hz, 2H), 3.84 (s, *J* = 6 Hz, 3H). <sup>13</sup>C NMR (150 MHz, CDCl<sub>3</sub>) δ 162.7, 161.1, 159.4, 133.4, 133.1, 117.1, 114.9, 114.7, 113.1, 112.6, 80.8, 78.9, 72.9, 71.5, 54.3.

**6. NMR spectra of homocoupling products.**

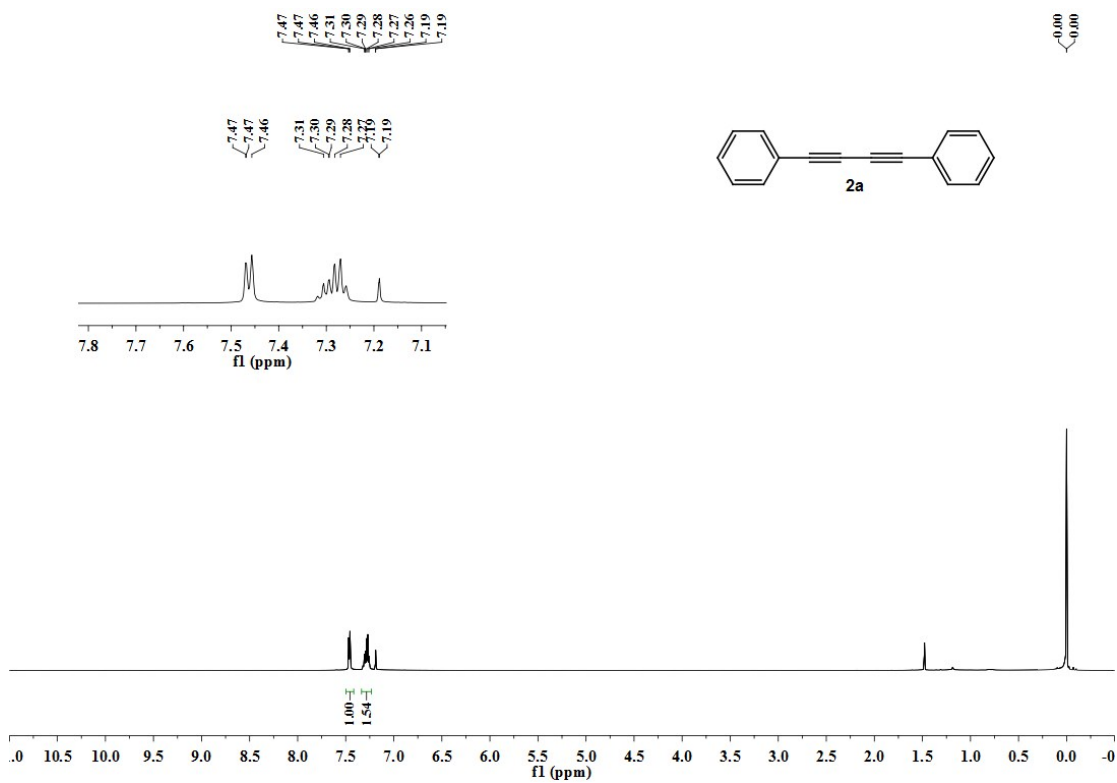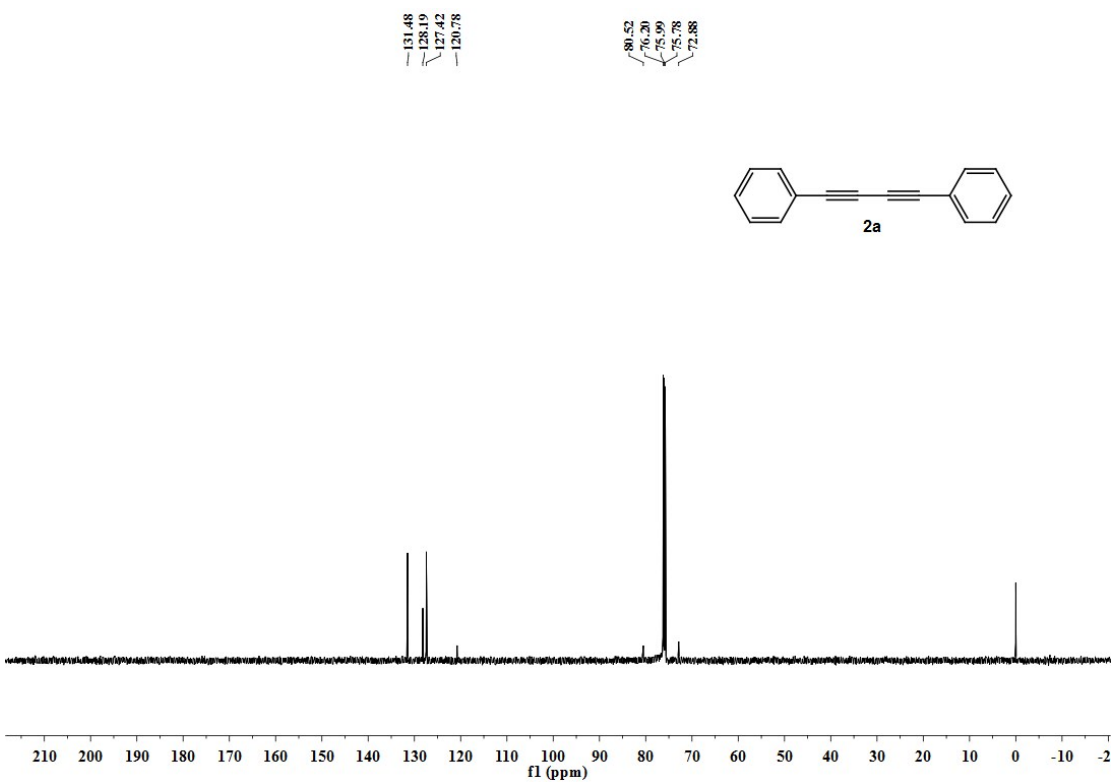

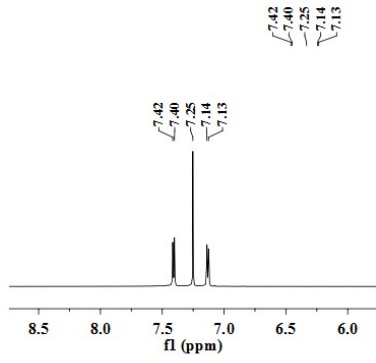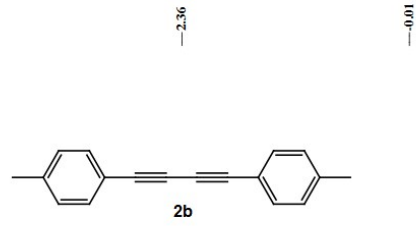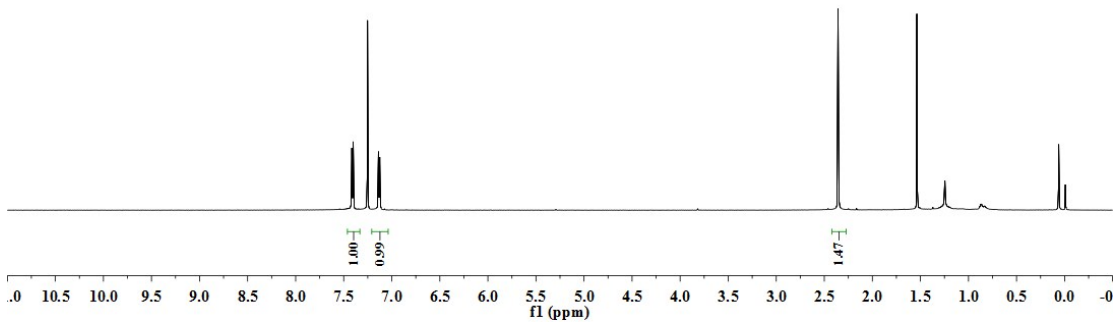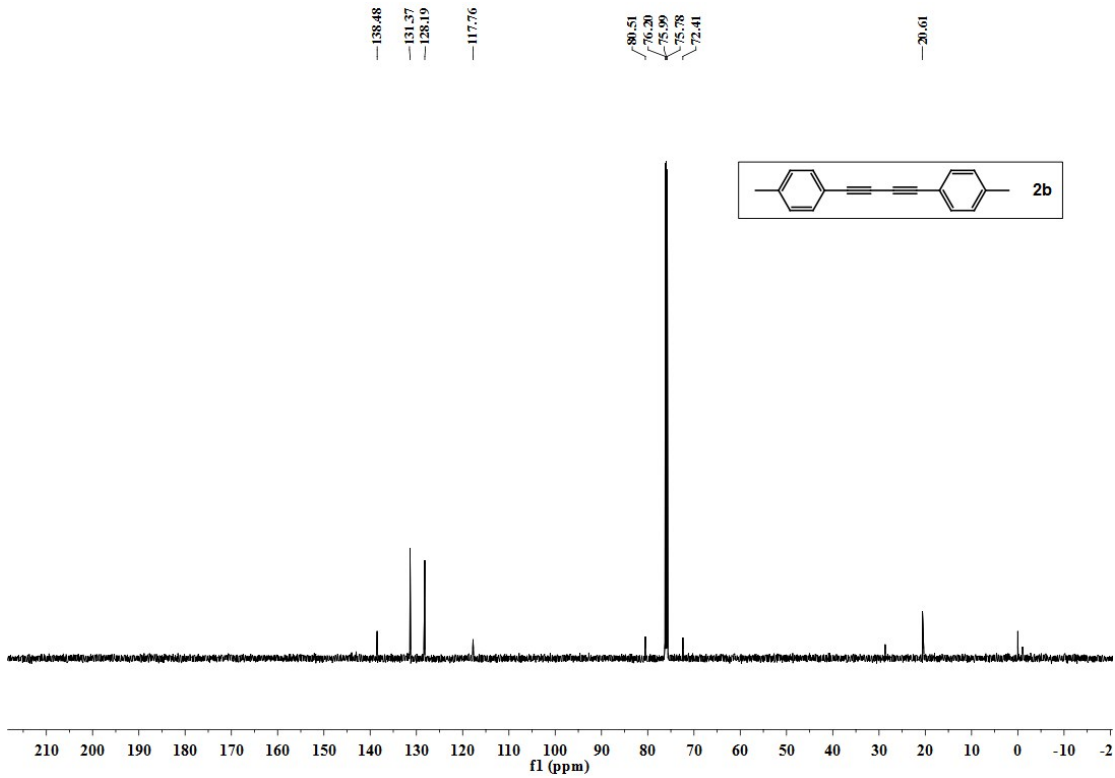



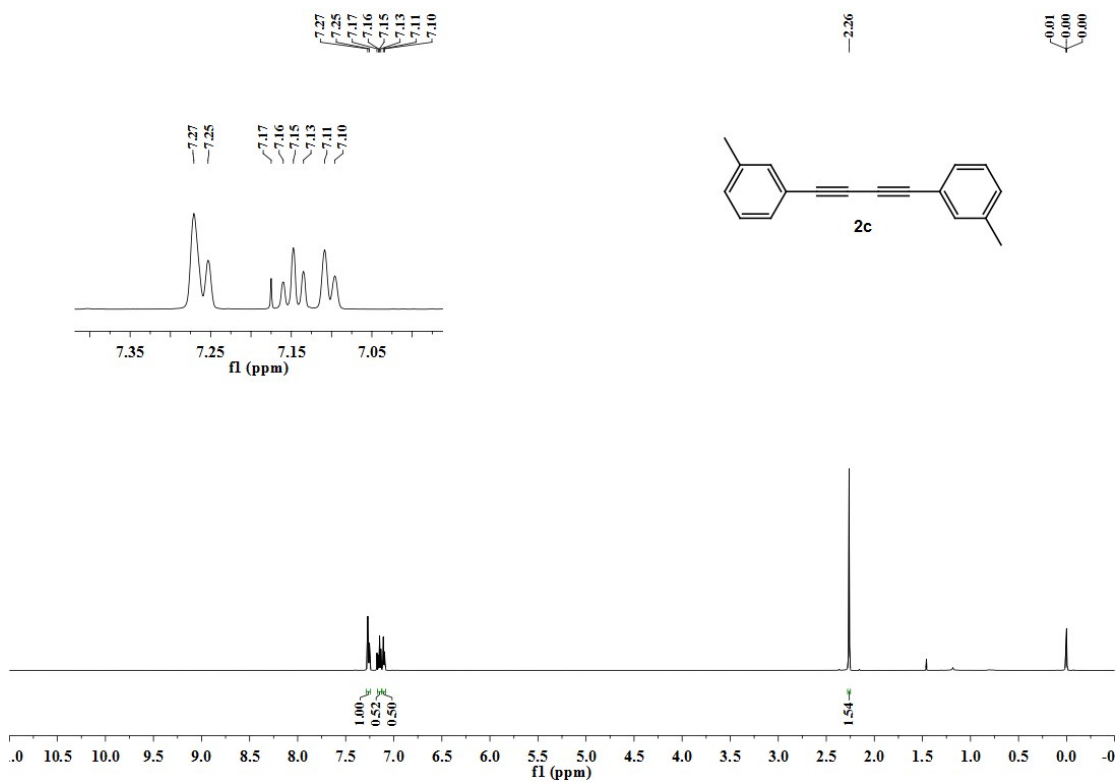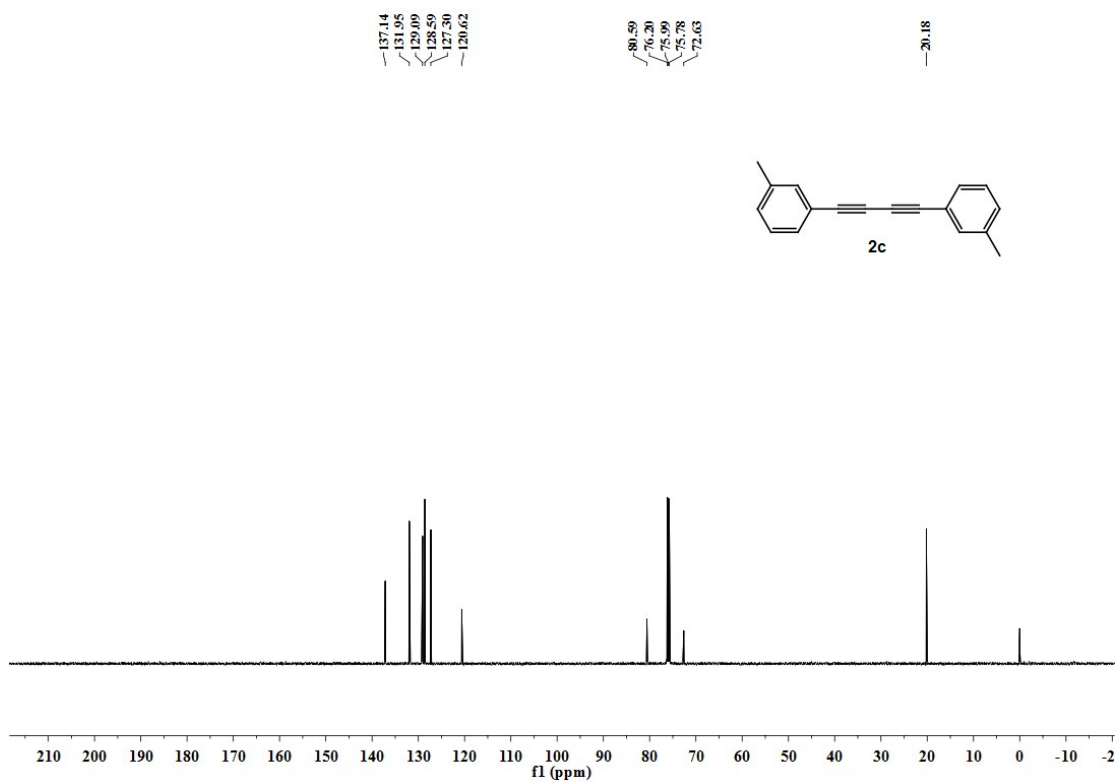

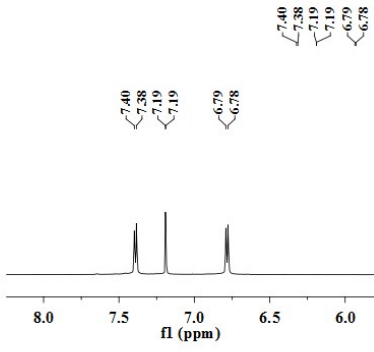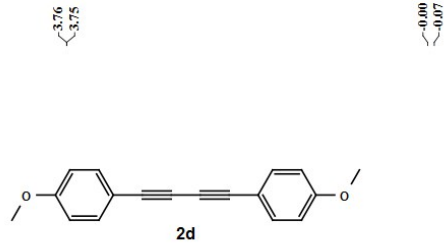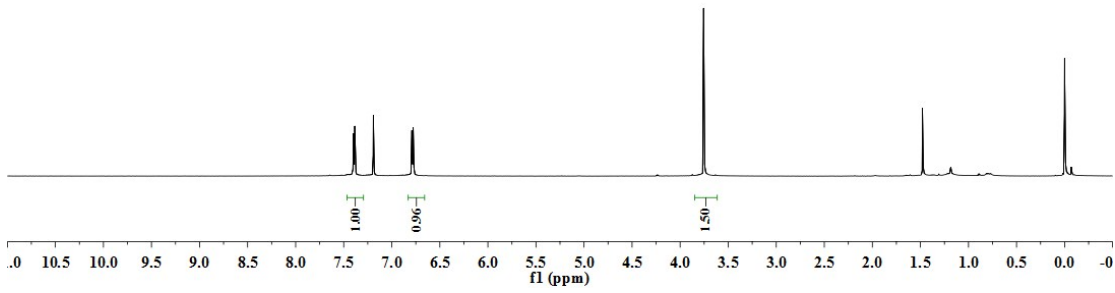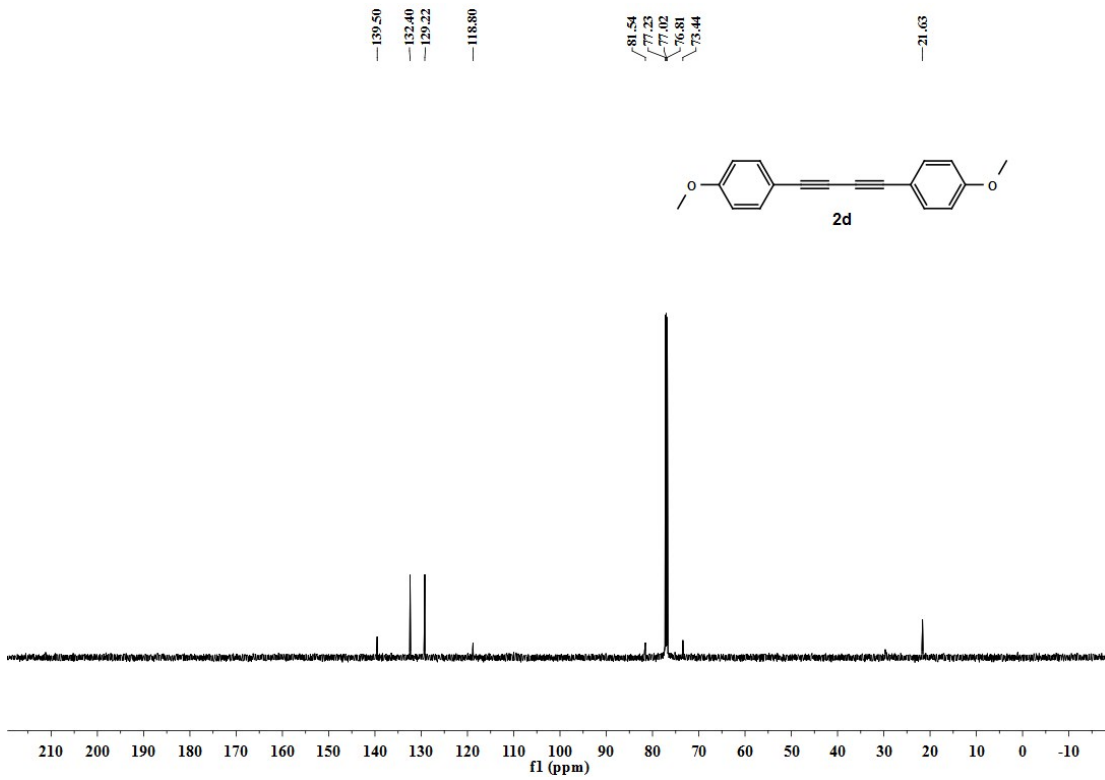

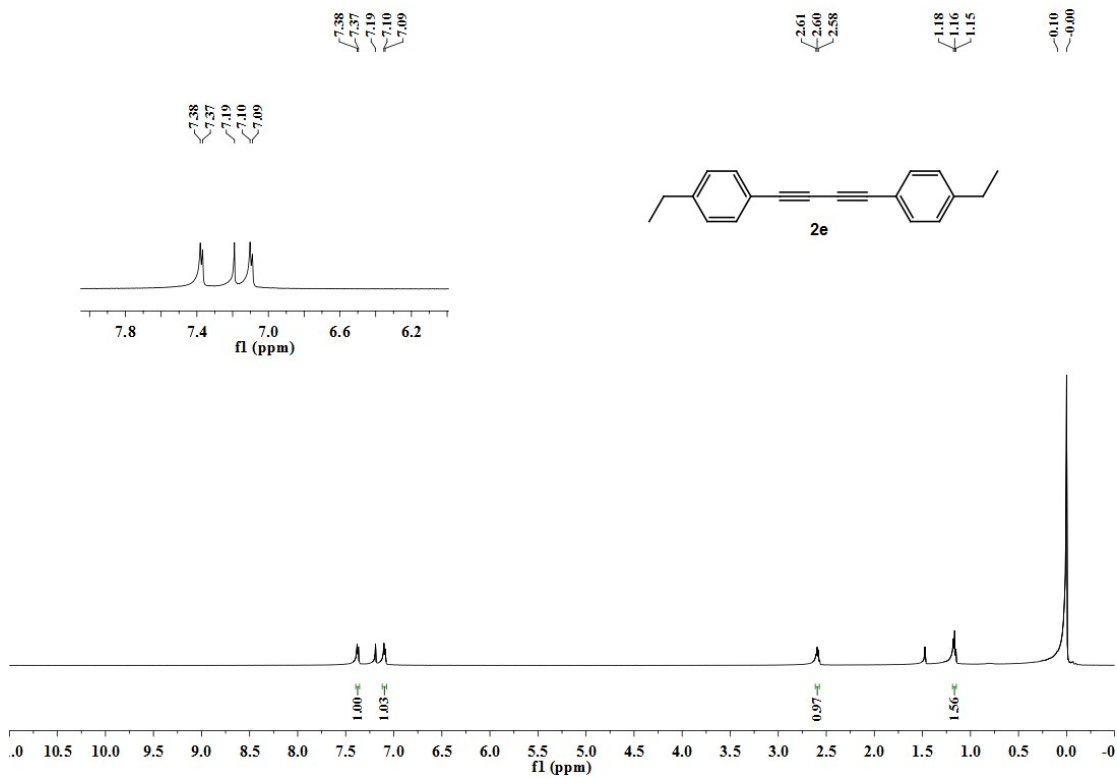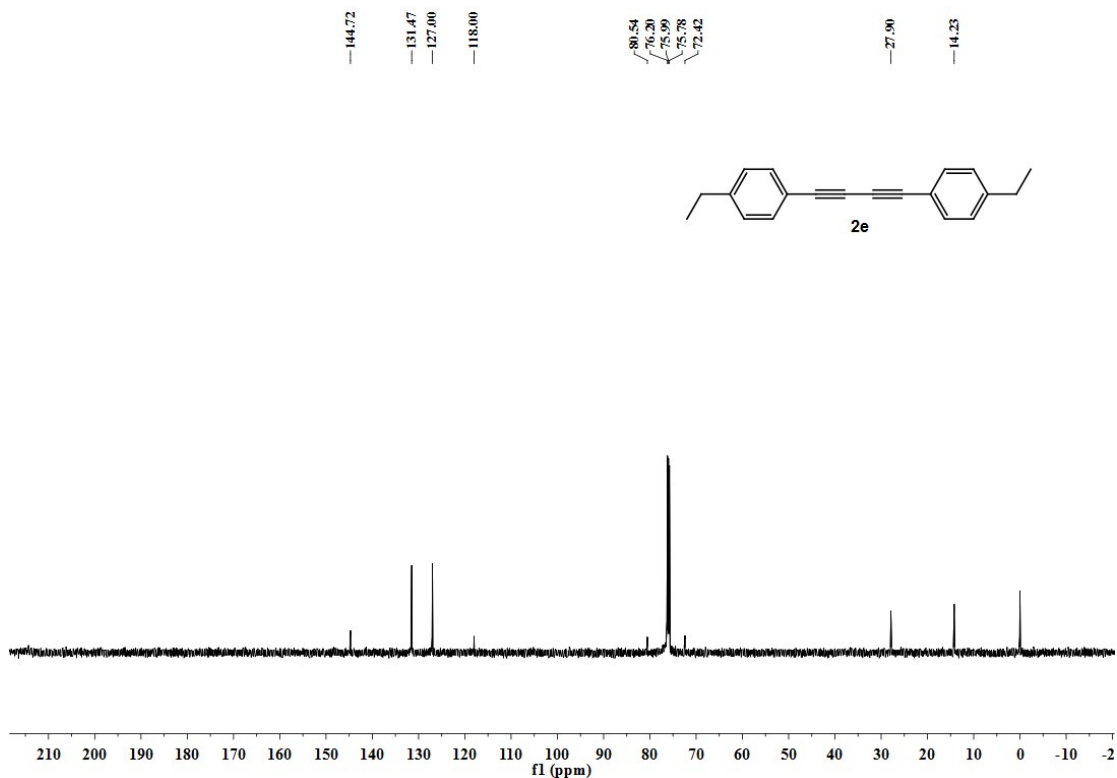

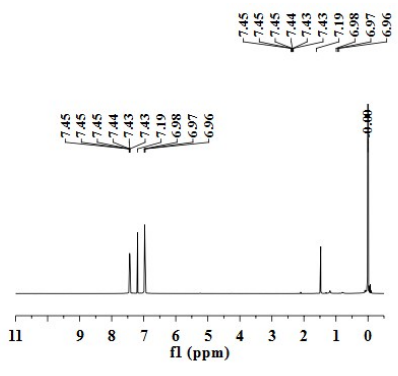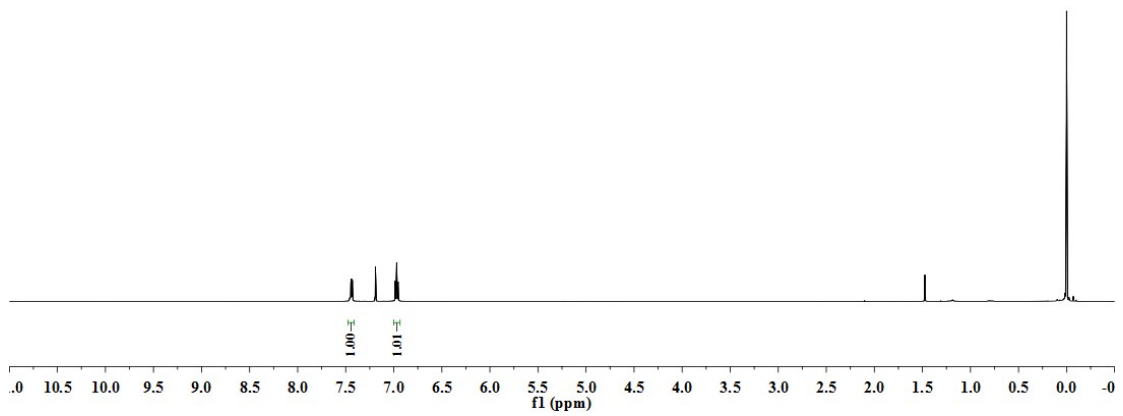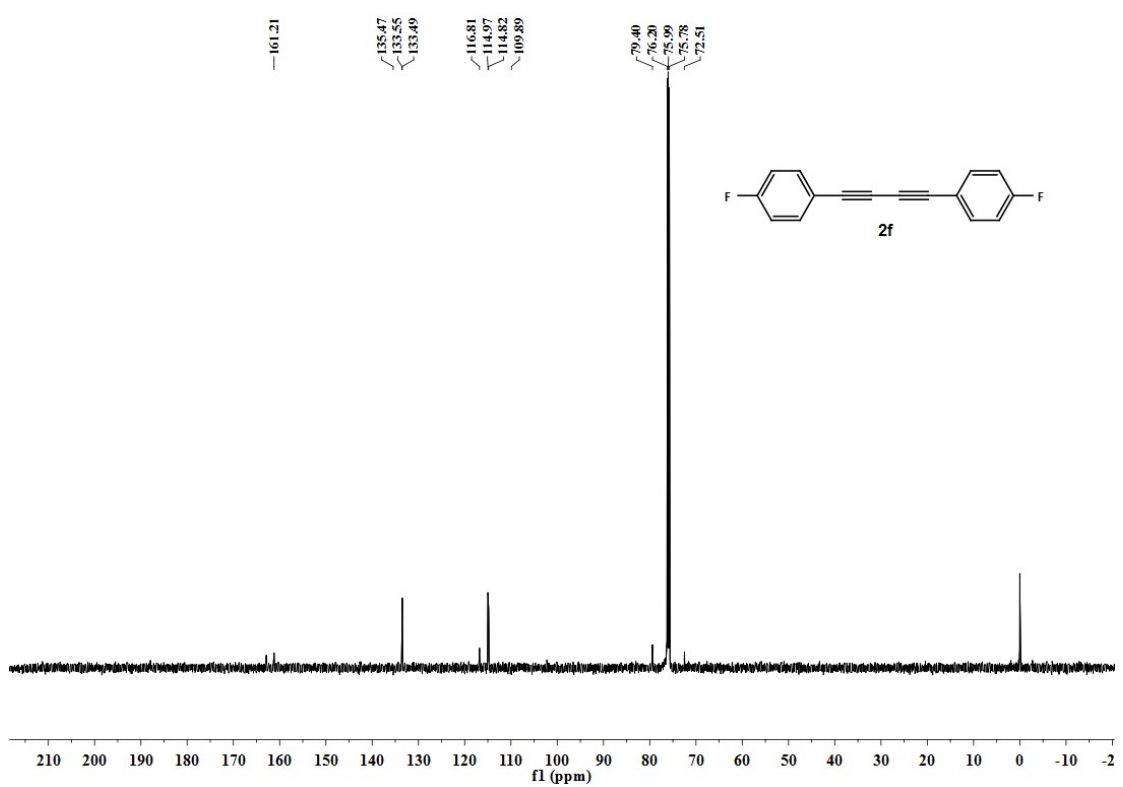

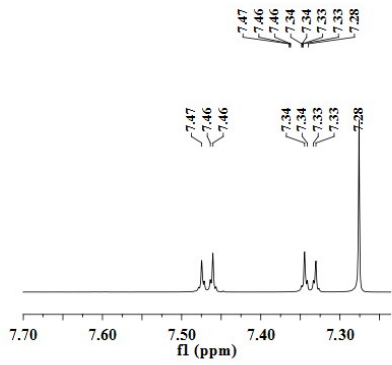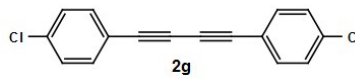

-0.01

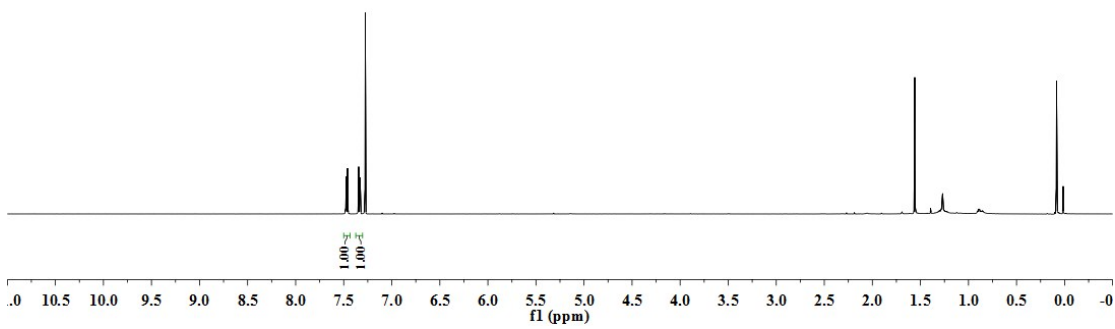

132.68  
128.85  
127.88  
121.77

76.20  
75.99  
75.78

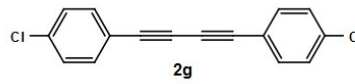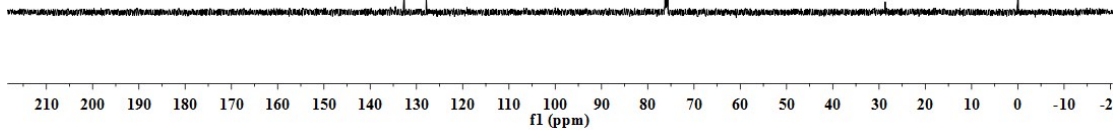

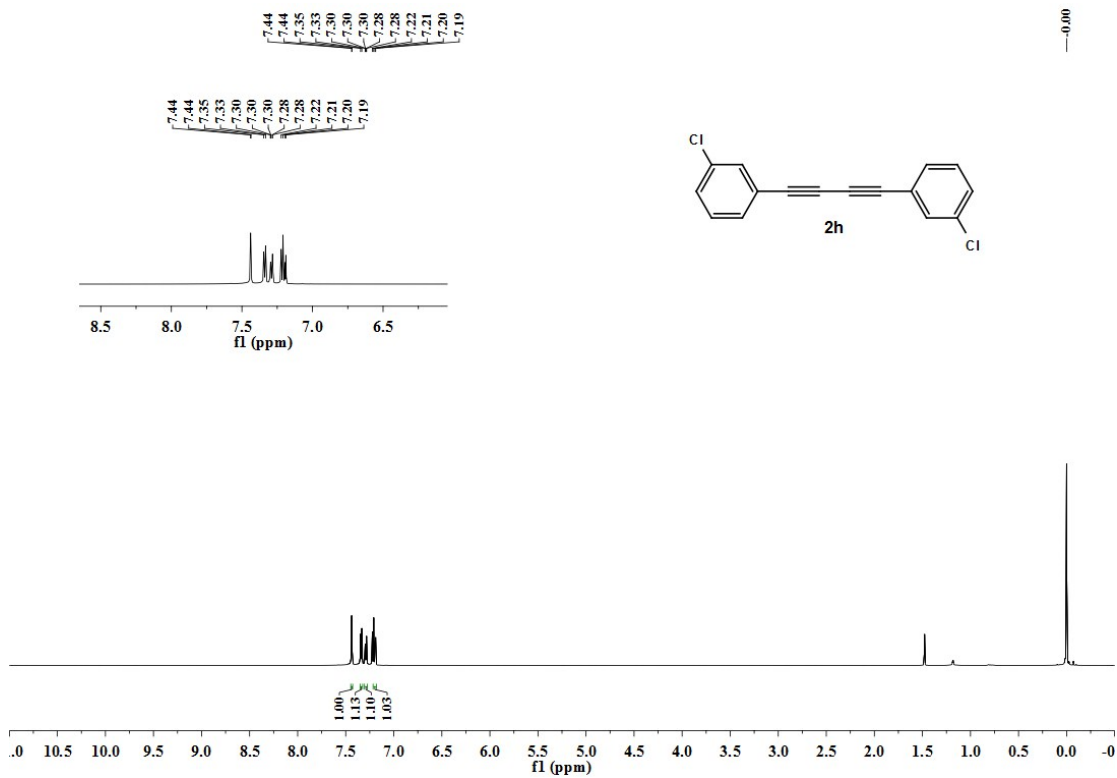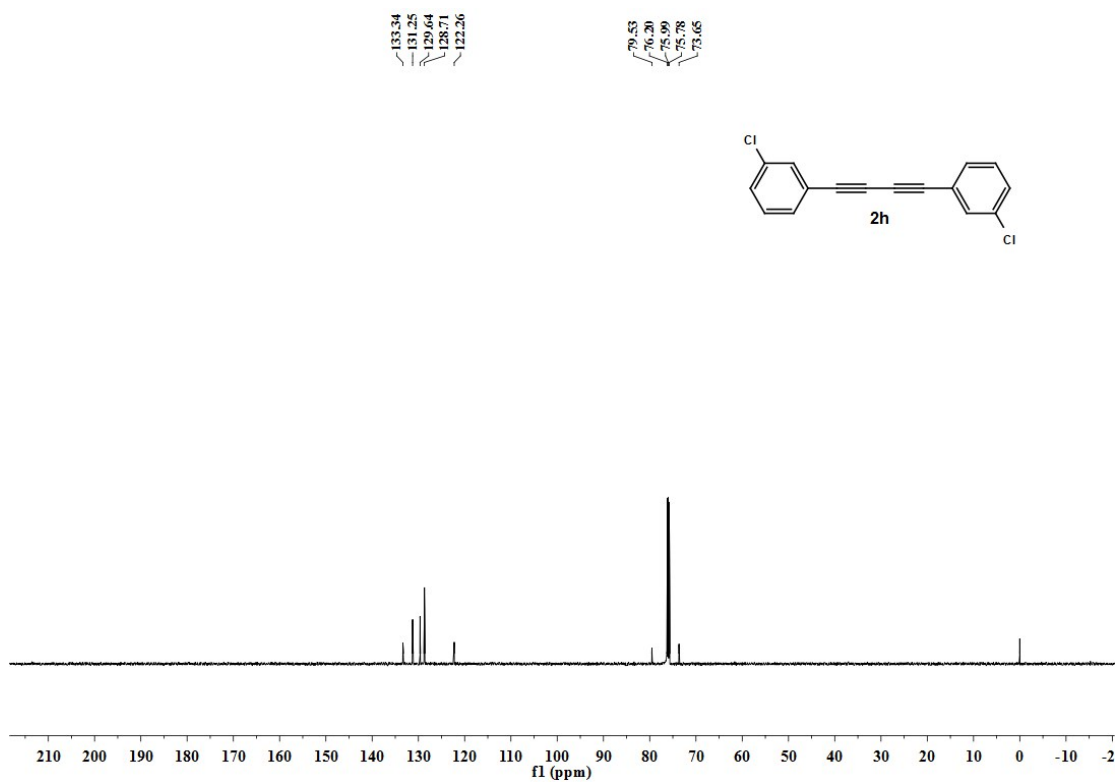

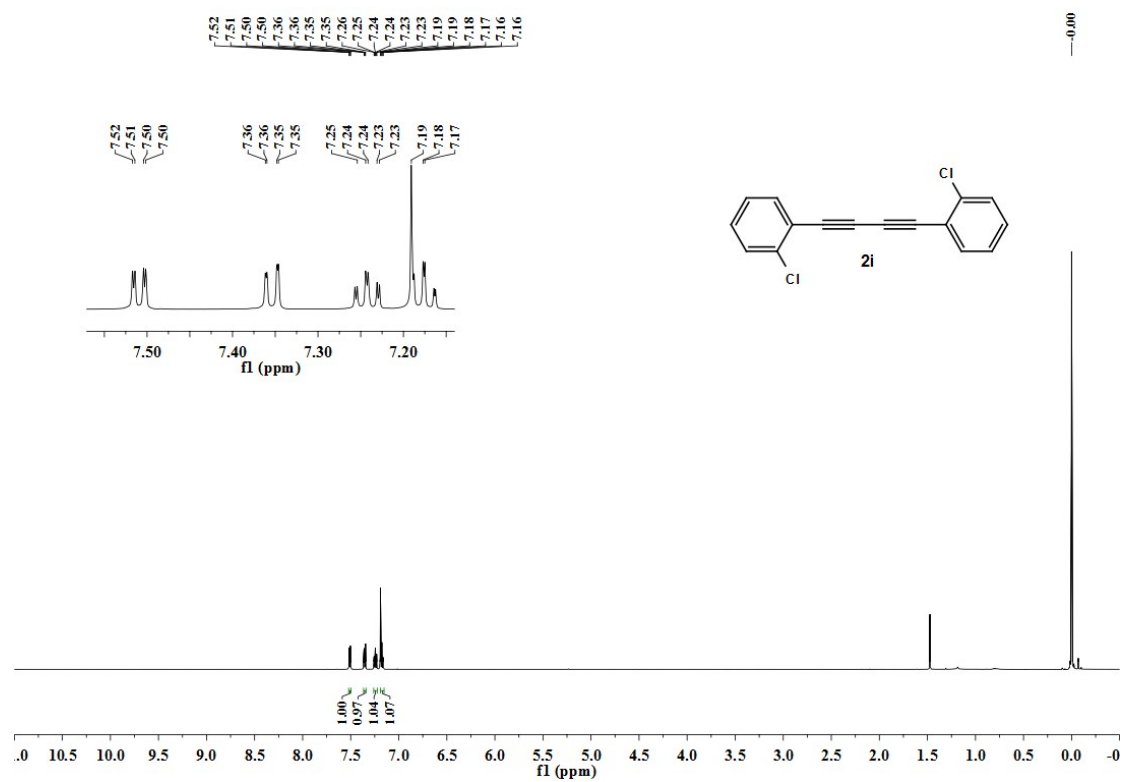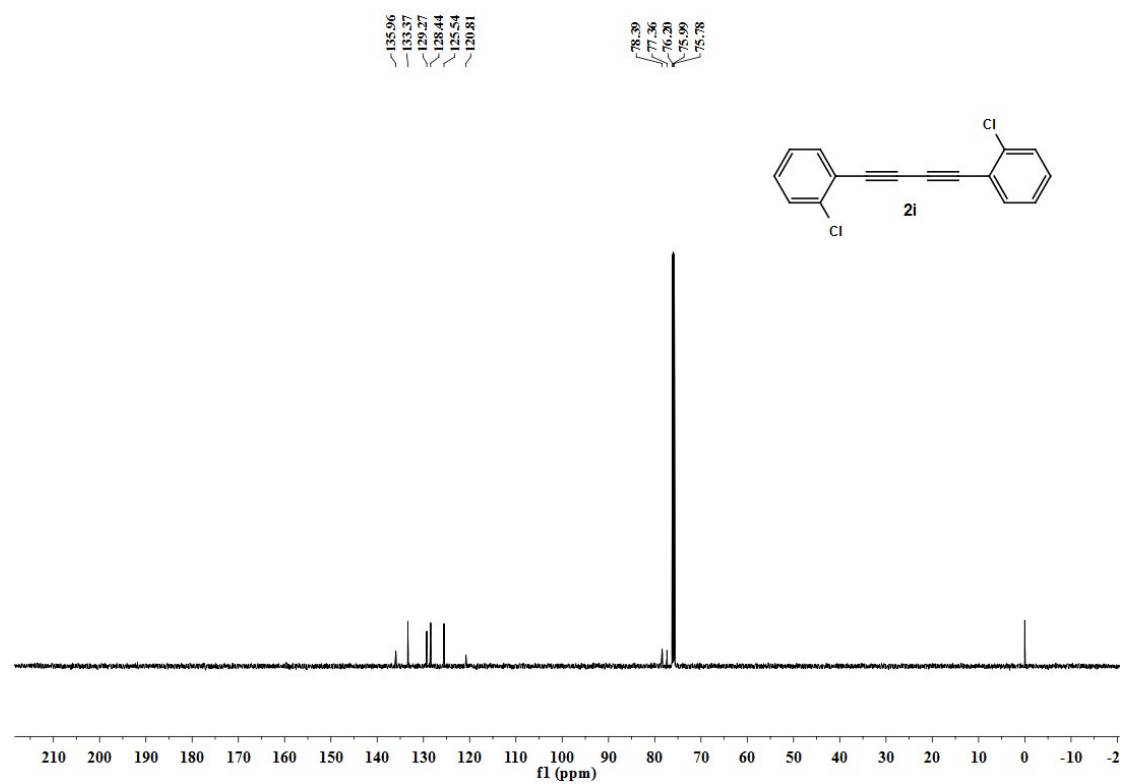

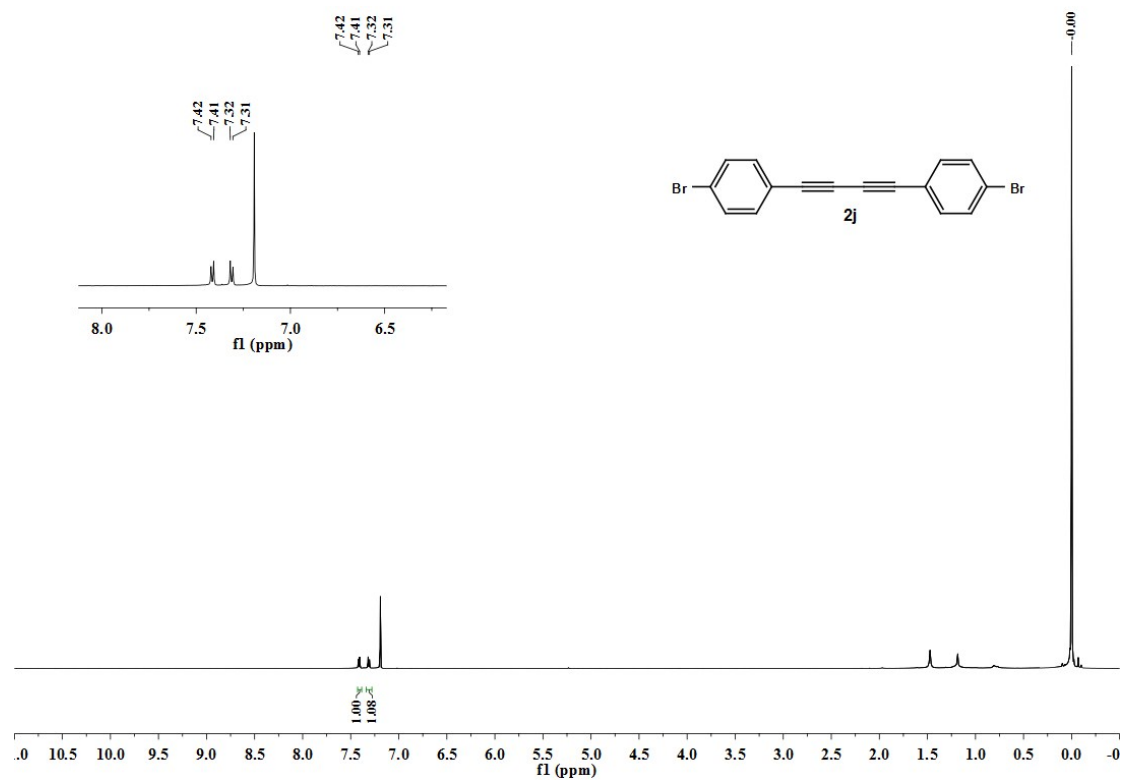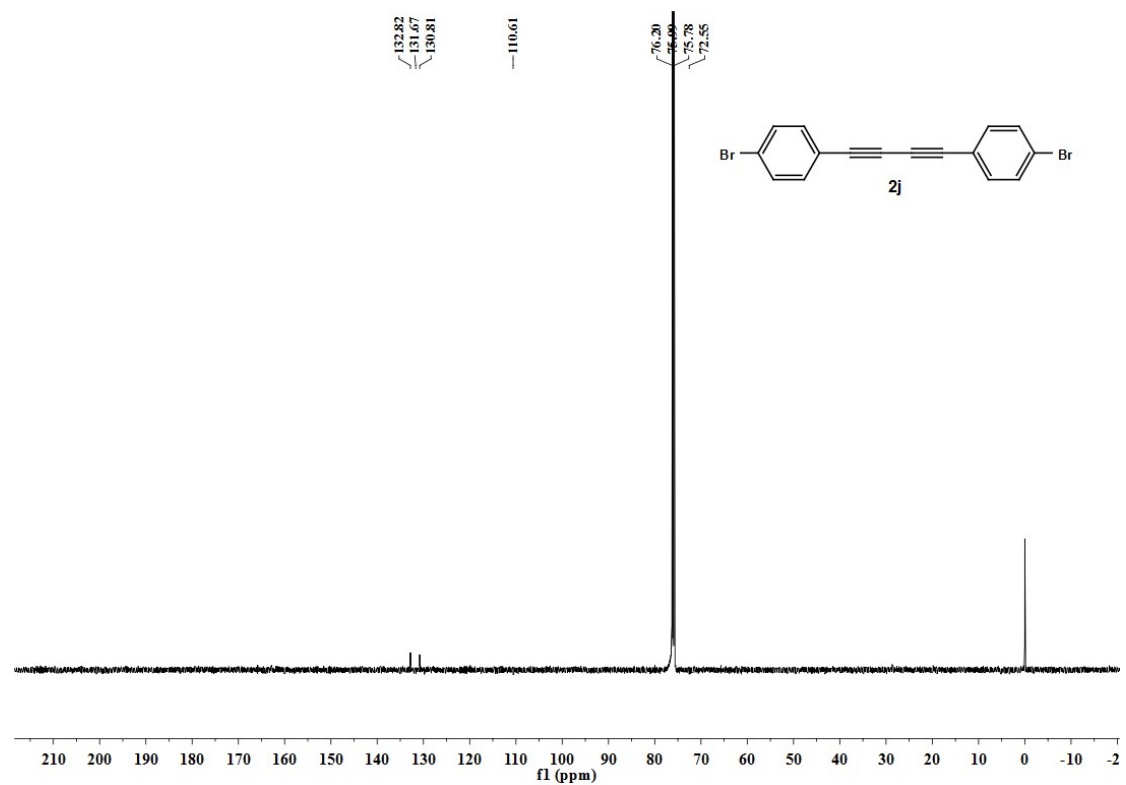





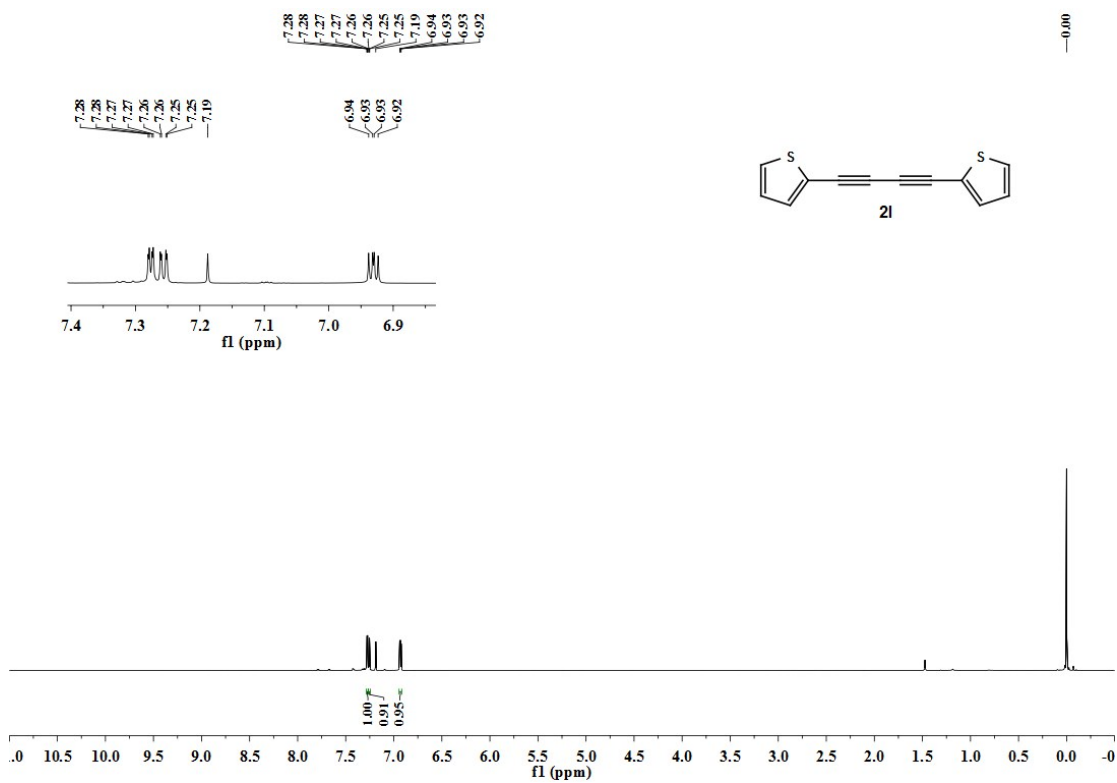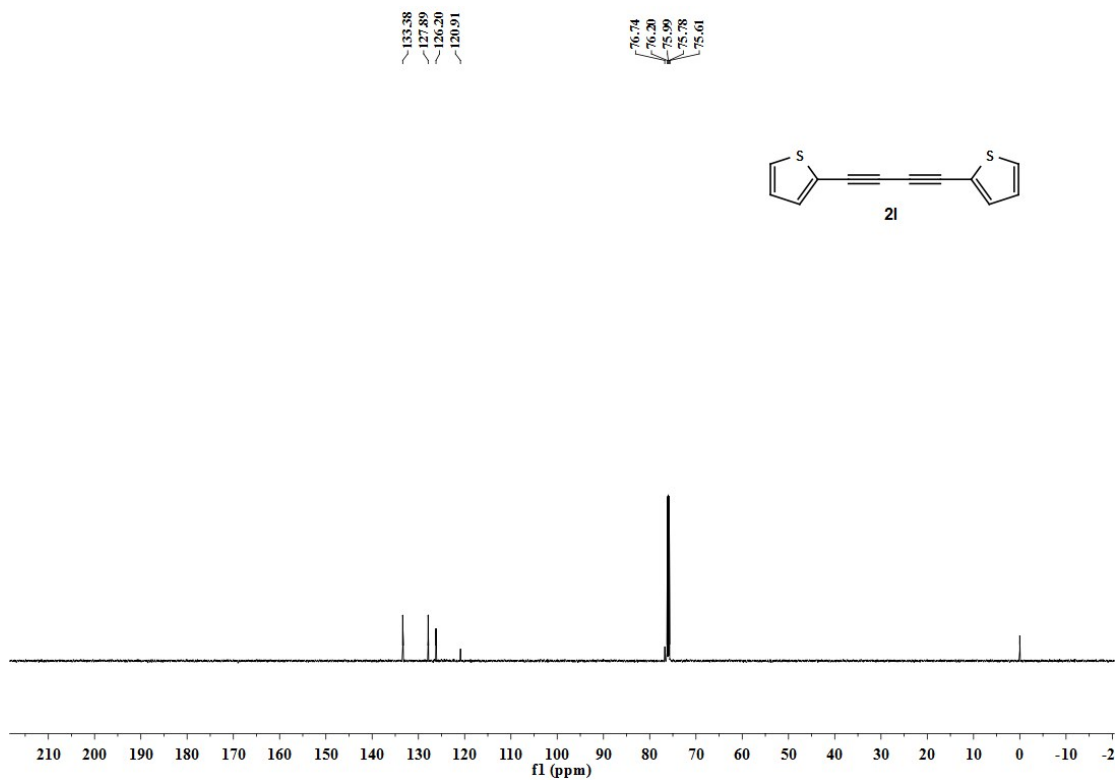

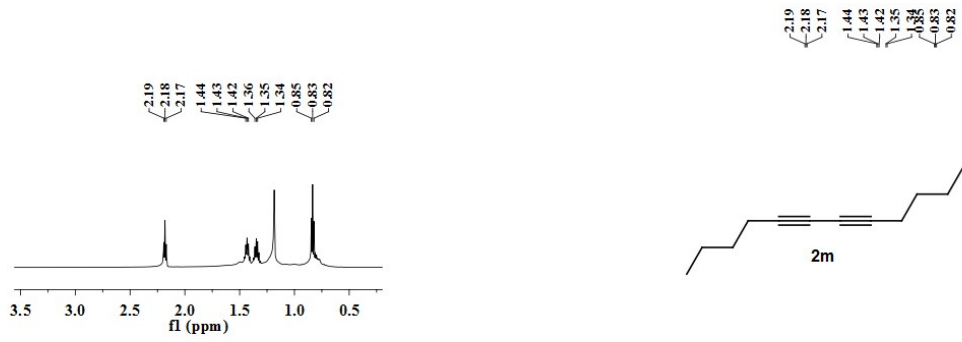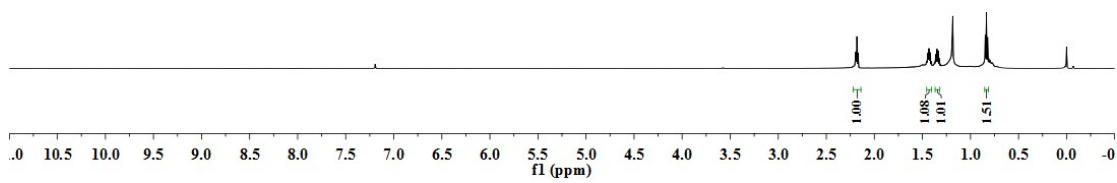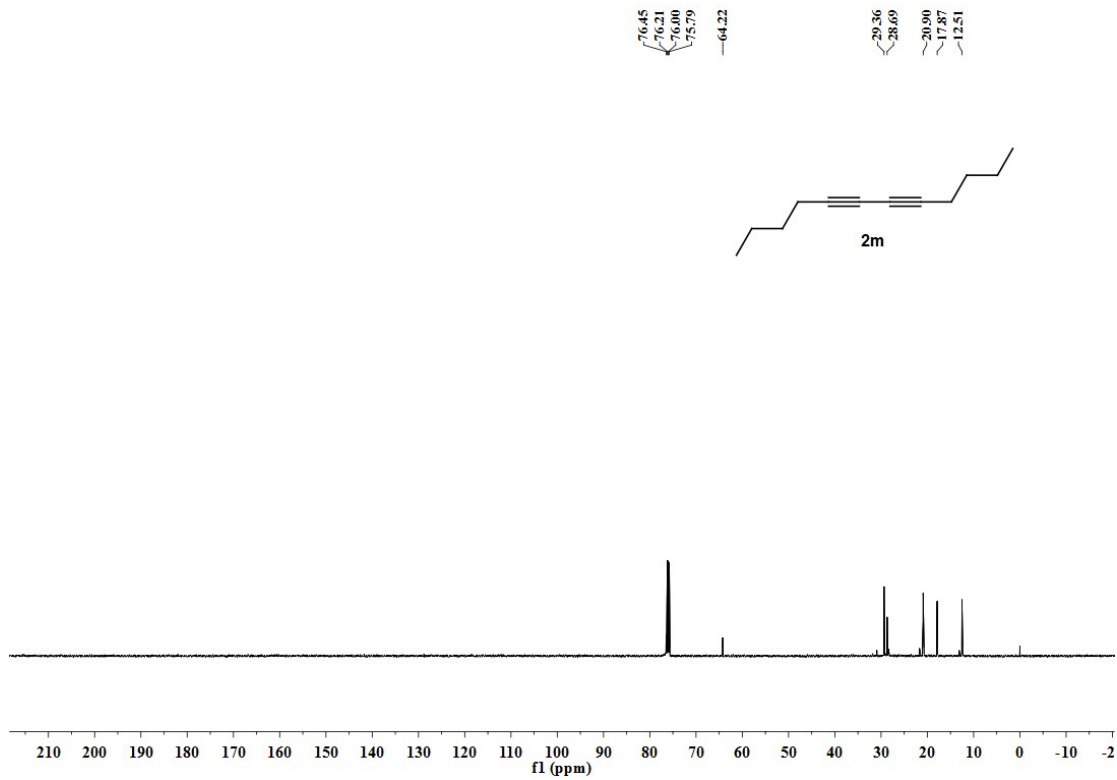

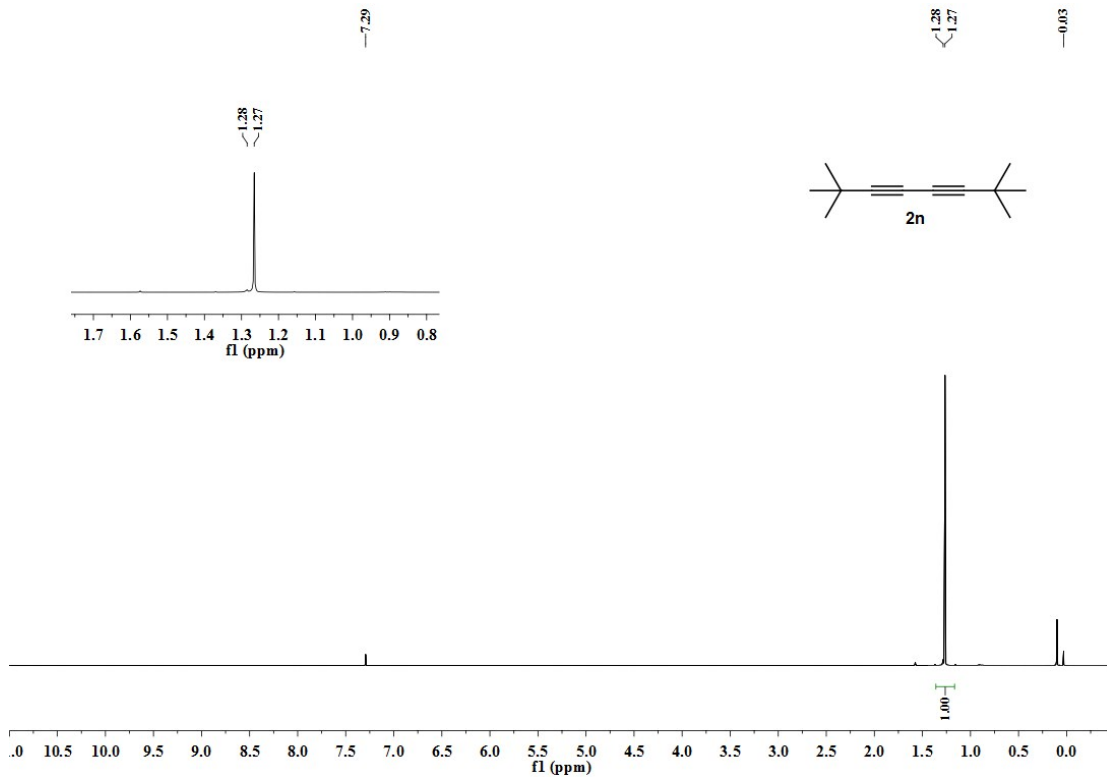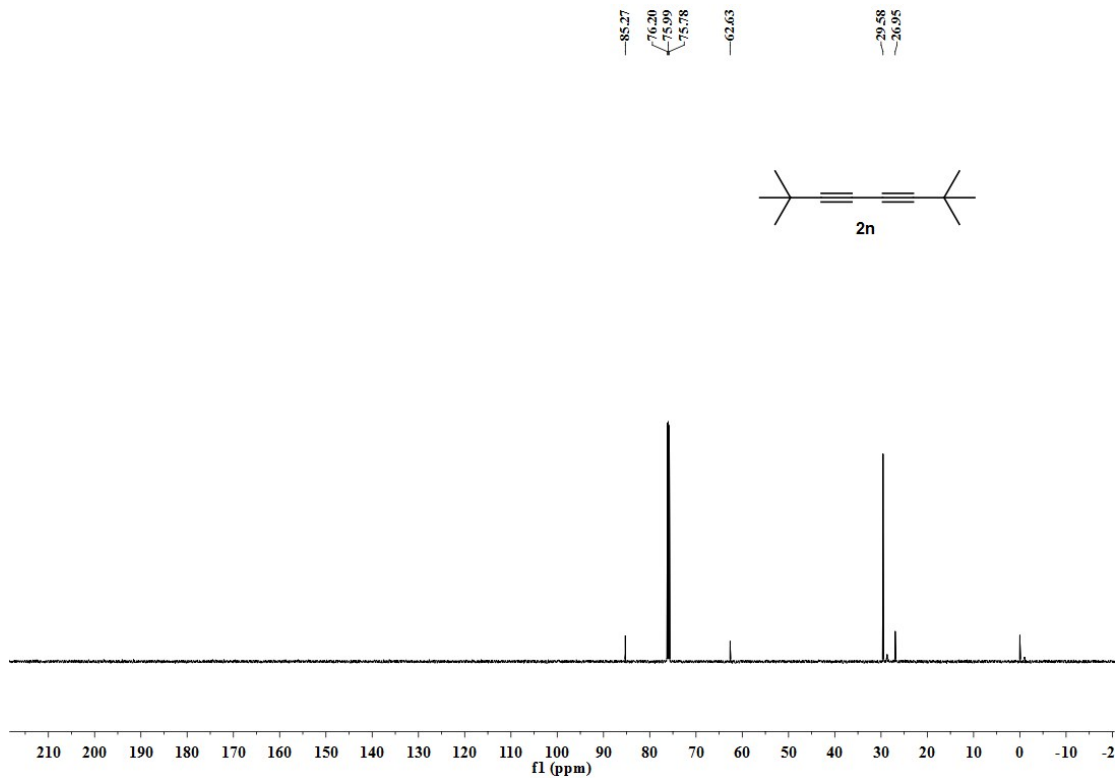

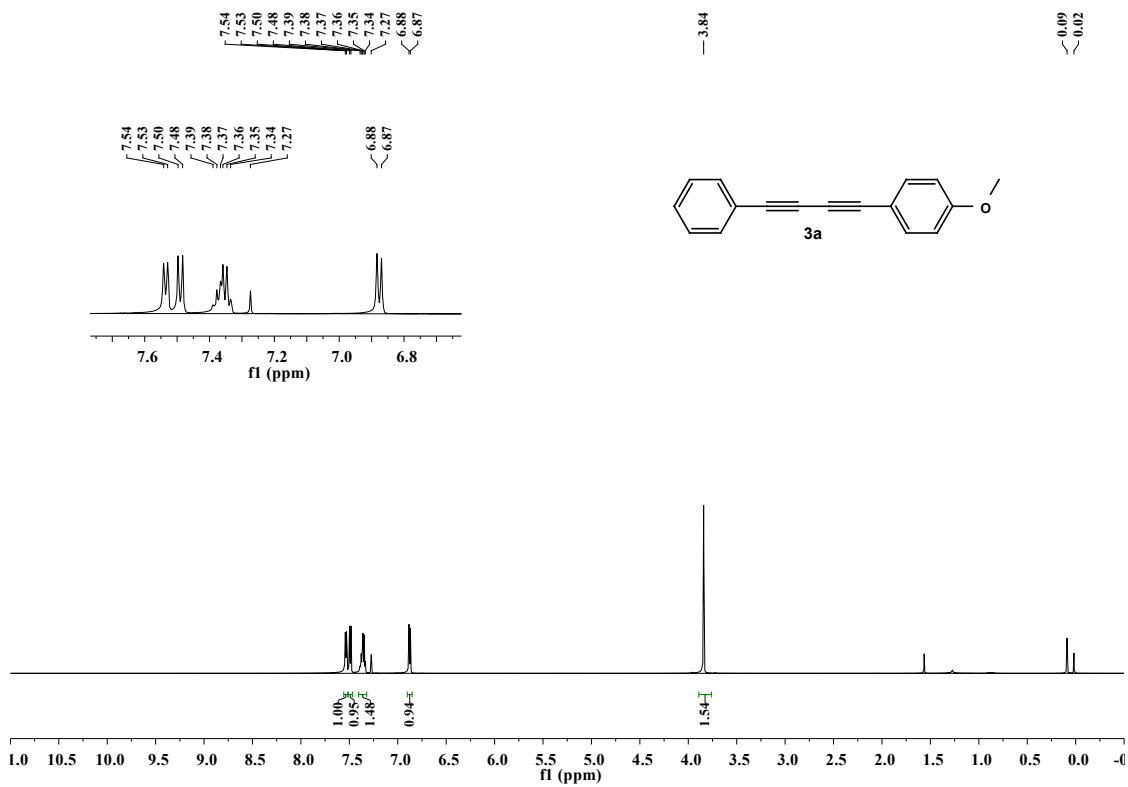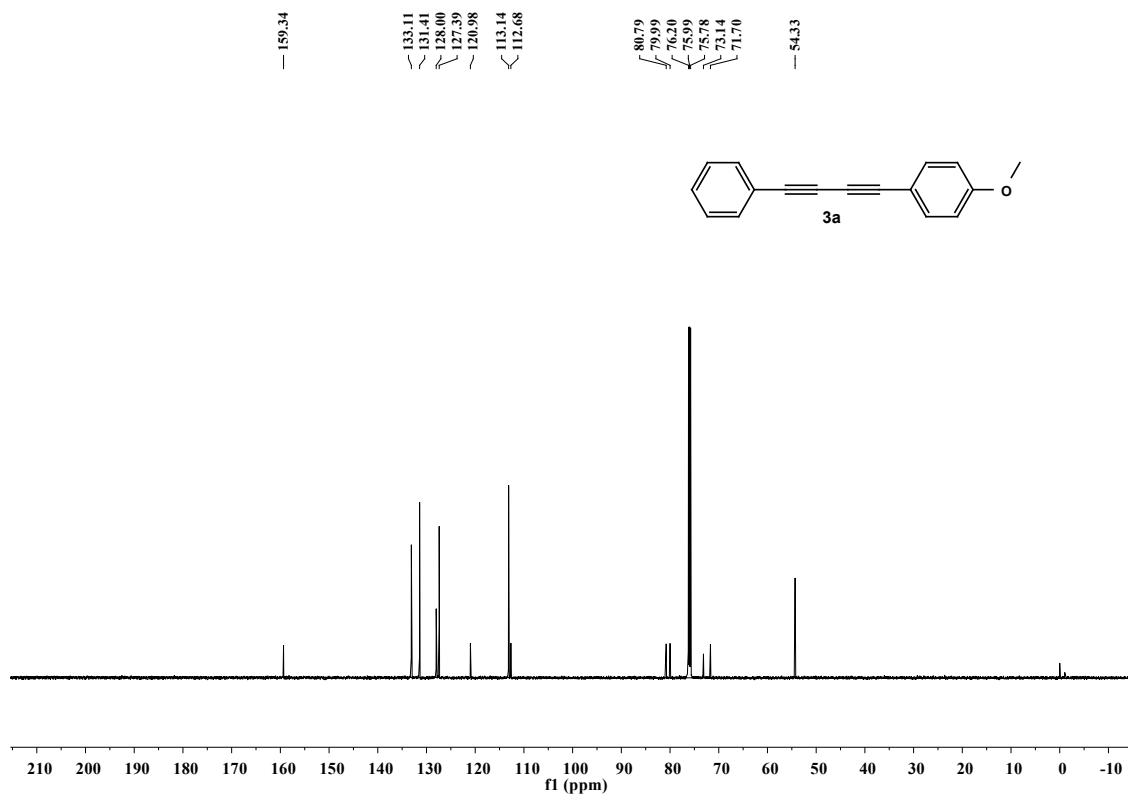

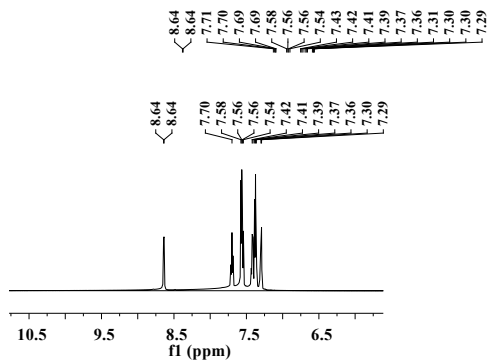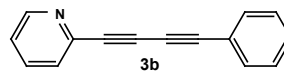

0.10  
0.03

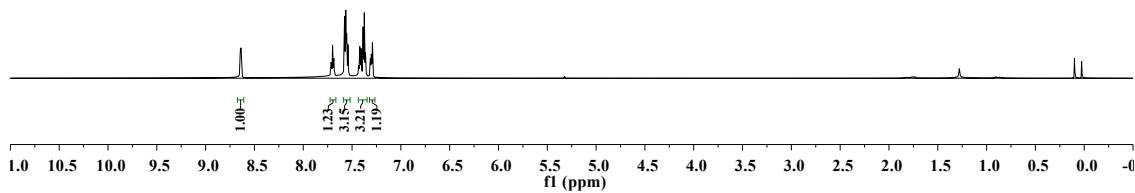

150.37  
142.33  
136.16  
132.70  
129.59  
128.49  
128.10  
123.48  
121.33

82.49  
80.24  
77.26  
77.05  
76.84  
73.78  
73.55

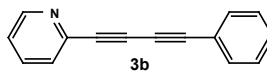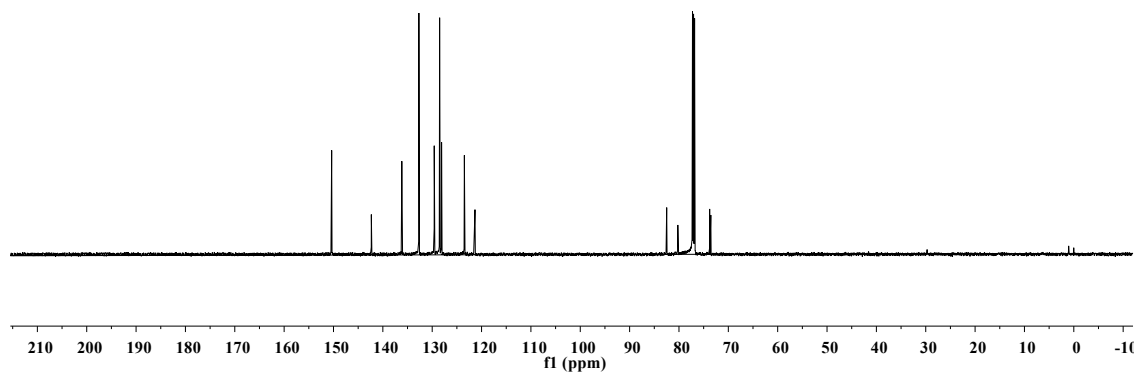

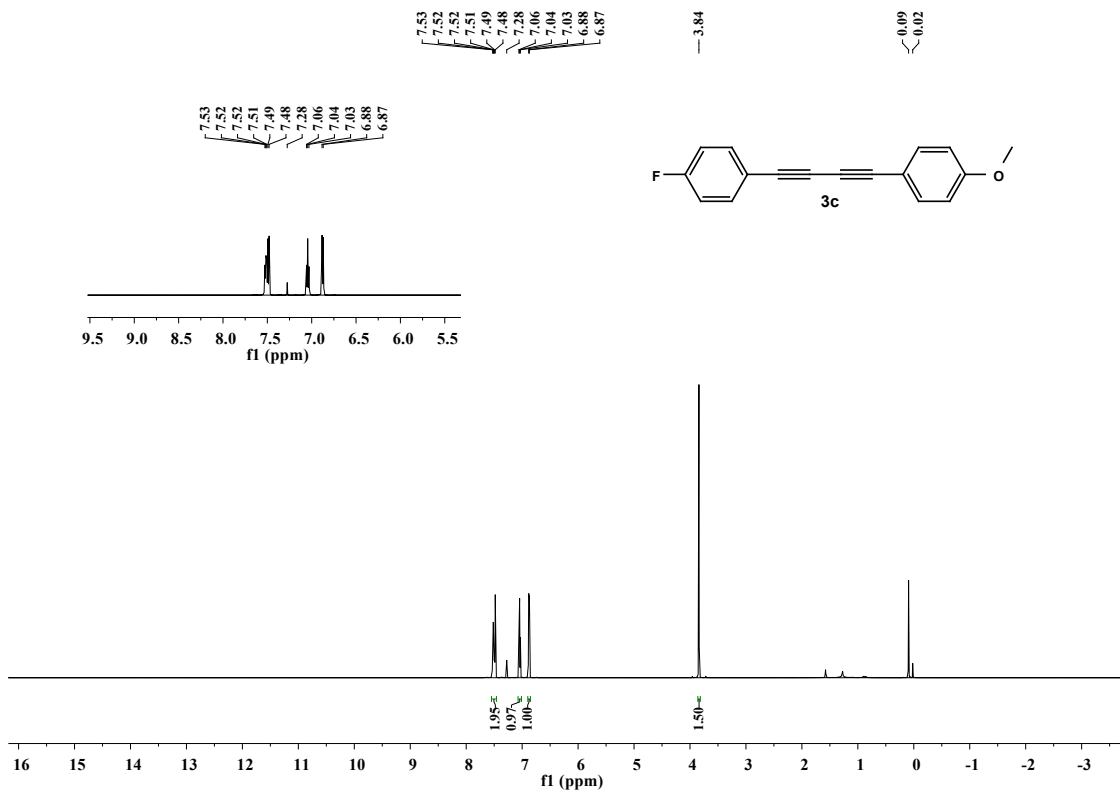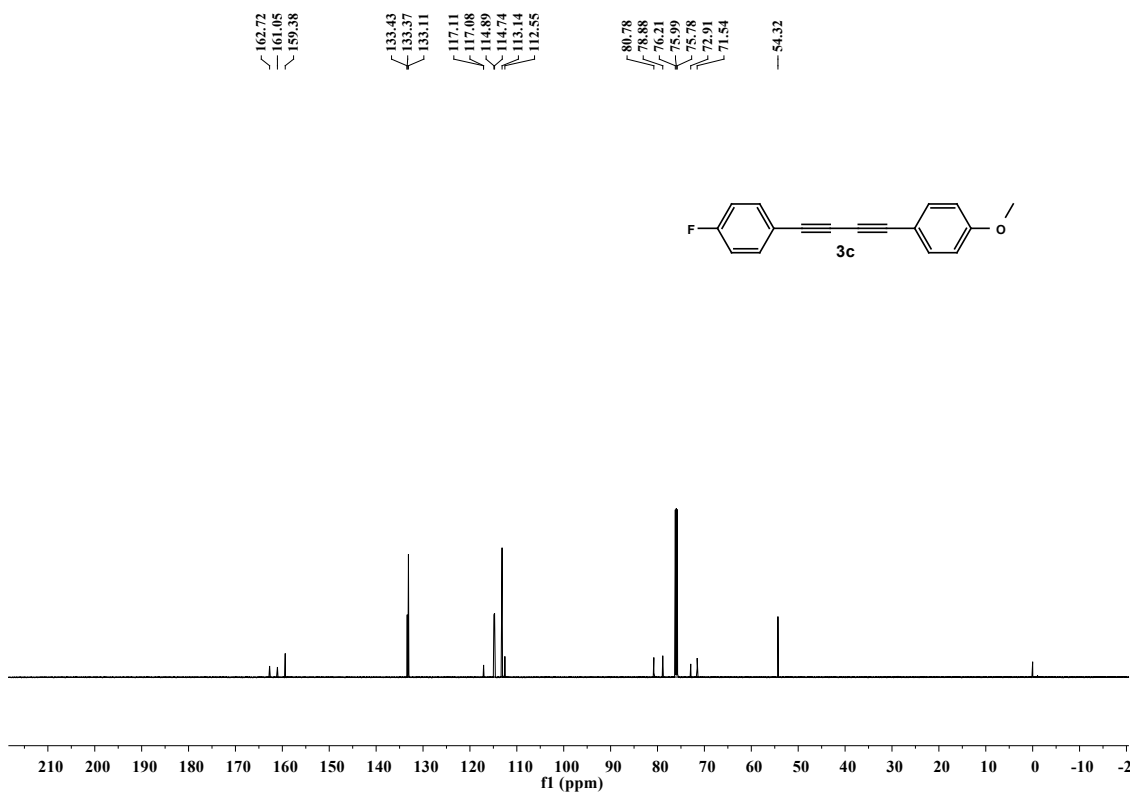

## 7. MS spectra of 2a, 2k.

T: + c Full ms [45.00-400.00]

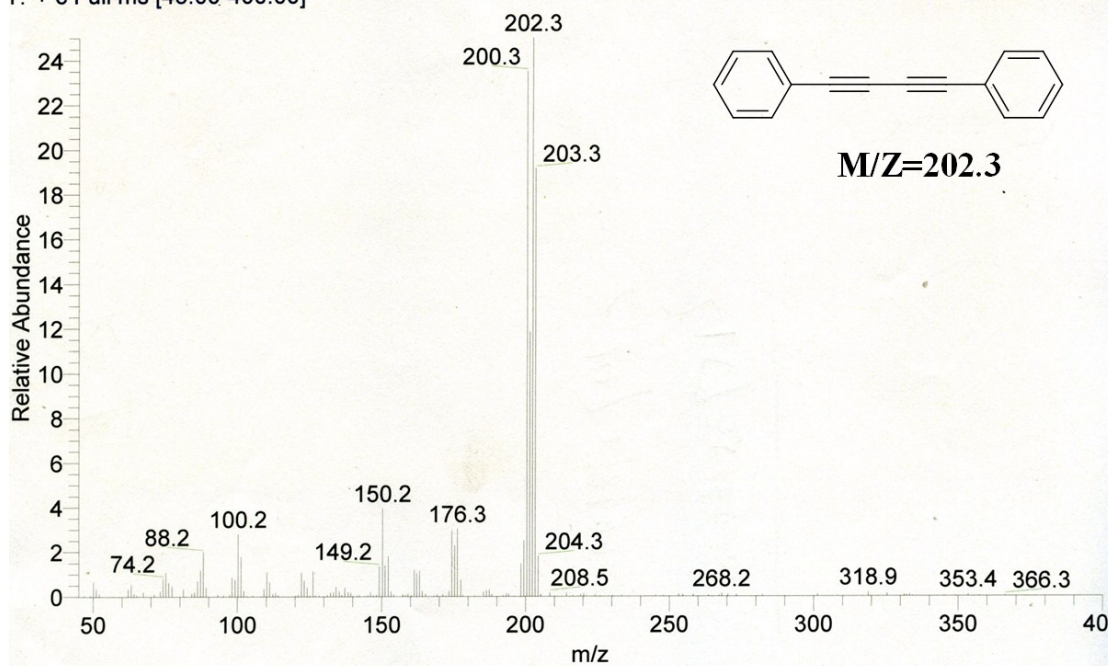

T: + c Full ms [45.00-400.00]

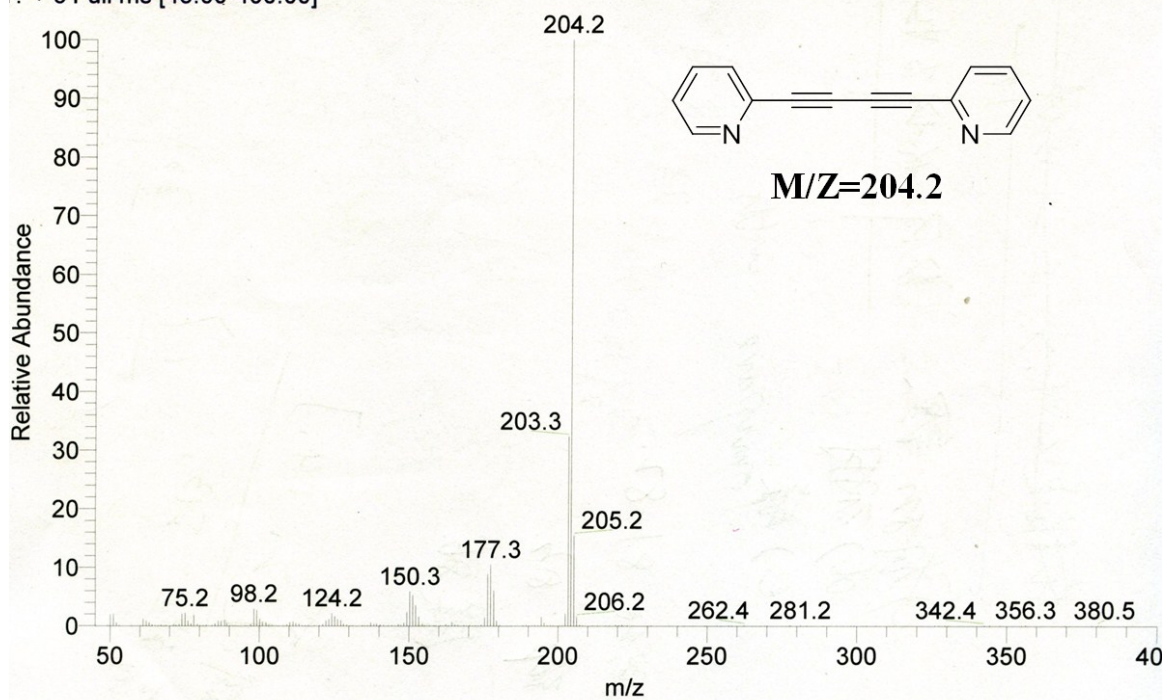



## 8. References

- [1] Cheng, G. L.; Zhang, H.; Cui, X. L. *RSC Adv.* **2014**, *4*, 1849–1852.
- [2] Xiao, R. A.; Yao, R. Y.; Cai, M. Z. *Eur. J. Org. Chem.* **2012**, 4178–4184.
- [3] Mizunoo, N.; Kamataa, K.; Nakagawaa, Y.; Oishia, T.; Yamaguchi, K. *Catalysis Today.* **2010**, *157*, 359–363.
- [4] Boronat, M.; Laursen, S.; Leyva-Pérez, A.; Oliver-Meseguer, J.; Combita, D.; Corma, A. *J. Catal.* **2014**, *315*, 6–14.
- [5] Li, H. L.; Yang, M.; Pu, Q. S. *Micropo. Mesopor Mat.* **2012**, *148*, 166–173.
- [6] Alonso, F.; Yus, M. *ACS Catal.* **2012**, *2*, 1441–1451.
- [7] Li, F. W.; Suo, Q. L.; Hong, H. L.; Zhu, N.; Wang, Y. Q.; Guo, L. L.; Han, L. M. *J. Supercrit. Fluid.* **2014**, *92*, 70-74.
- [8] Alonso, F.; Melkonian, T.; Moglie, Y.; Yus, M. *Eur. J. Org. Chem.* **2011**, 2524–2530.
- [9] Yin, K.; Li, C.J. Li, J.; Jia, X.S. *Appl. Organomet. Chem.* **2011**, *25*, 16–20.
- [10] Li, J. H.; Liang, Y.; Xie, Y. X. *J. Org. Chem.* **2005**, *70*, 4393–4396.
- [11] Wang, D.; Li, J.; Li, N.; Gao, T.; Hou, S.; Chen, B. *Green Chem.*, **2010**, *12*, 45-48.
- [12] Zhang, S.; Liu, X. Y.; Wang, T. Q. *Adv. Synth. Catal.*, **2011**, *353*, 1463-1466.
